# Supplementary material for: GC-MS/MS Quantification of EGFR Inhibitors, β-Sitosterol, Betulinic Acid, (+) Eriodictyol, (+) Epipinoresinol, and Secoisolariciresinol, in Crude Extract and Ethyl Acetate Fraction of Thonningia sanguinea
Source: MDPI journal article supplement (doi:10.3390/molecules27134109), 2022-06-26
Supplement: s1 [file s1]

# GC-MS/MS Quantification of EGFR Inhibitors, $\beta$ -Sitosterol, Betulinic acid, (+) Eriodictyol, (+) Epipinoresinol and Secoisolariciresinol, in Crude Extract and Ethyl Acetate Fraction of *Thonningia sanguinea*

## Additional Experimental Detail

- Figure S1:** GC-MS/MS chromatograms of  $\beta$ -sitosterol in a standard solution (A), in the methanolic *T. sanguinea* crude extract (B) and its ethyl acetate fraction (C).
- Figure S2:** GC-MS/MS chromatograms of betulinic acid in a standard solution (A), in the methanolic *T. sanguinea* crude extract (B) and its ethyl acetate fraction (C).
- Figure S3:** GC-MS/MS chromatograms of eriodictyol in a standard solution (A), in the methanolic *T. sanguinea* crude extract (B) and its ethyl acetate fraction (C).
- Figure S4:** GC-MS/MS chromatograms of epipinoresinol in a standard solution (A), in the methanolic *T. sanguinea* crude extract (B) and its ethyl acetate fraction (C).
- Figure S5:** GC-MS/MS chromatograms of secoisolariciresinol in a standard solution (A), in the methanolic *T. sanguinea* crude extract (B) and its ethyl acetate fraction (C).

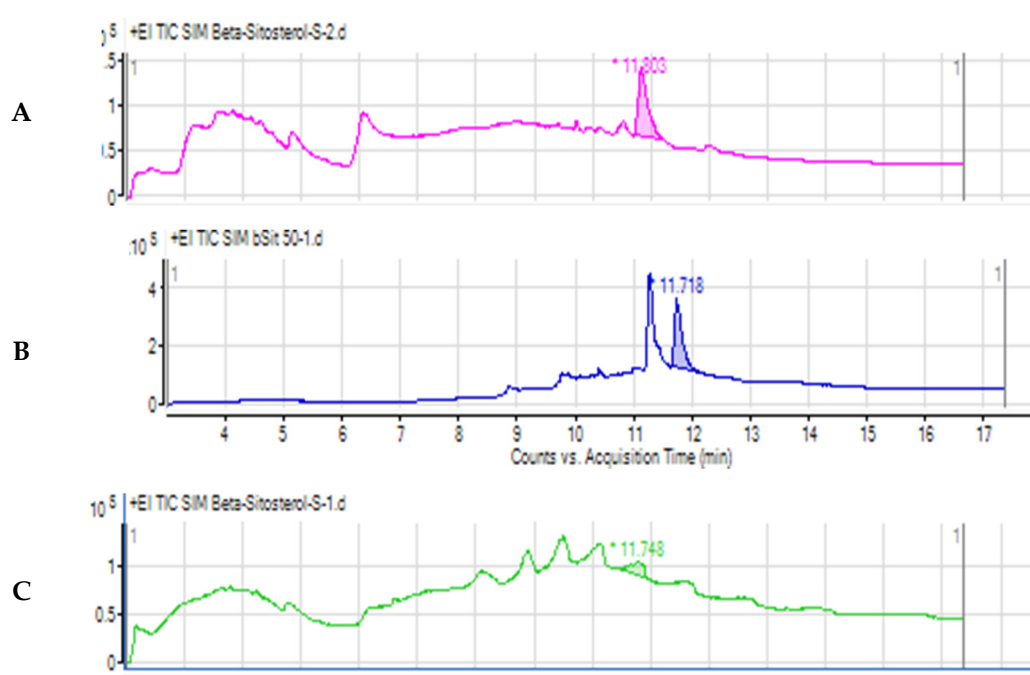

**Figure S1.** GC-MS/MS chromatograms of  $\beta$ -sitosterol in a standard solution (A), in the methanolic *T. sanguinea* crude extract (B) and its ethyl acetate fraction (C).

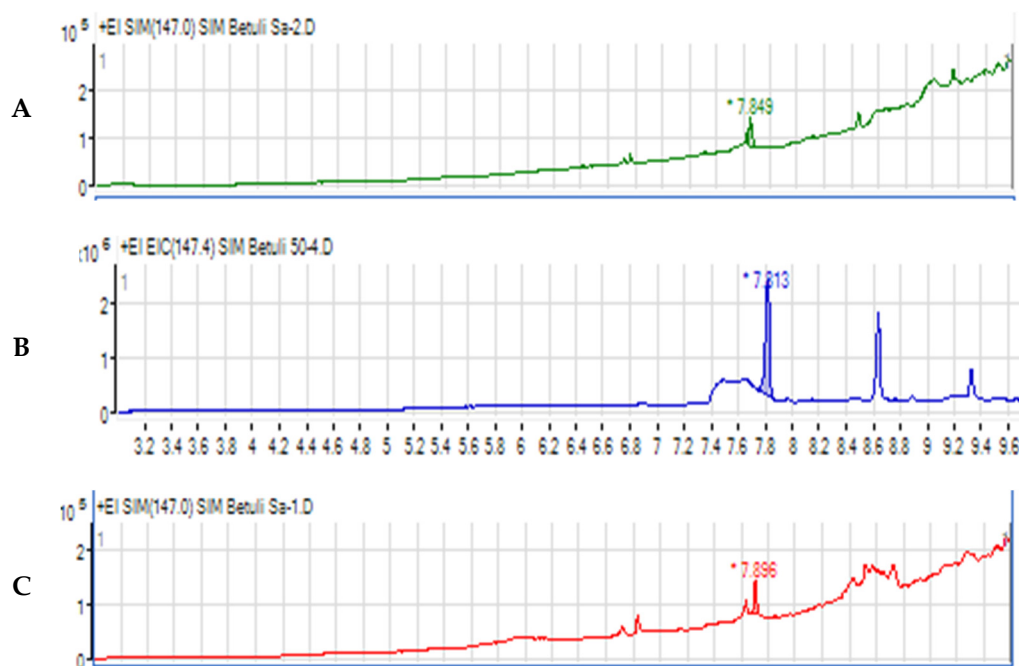

**Figure S2.** GC-MS/MS chromatograms of betulinic acid in a standard solution (A), in the methanolic *T. sanguinea* crude extract (B) and its ethyl acetate fraction (C).

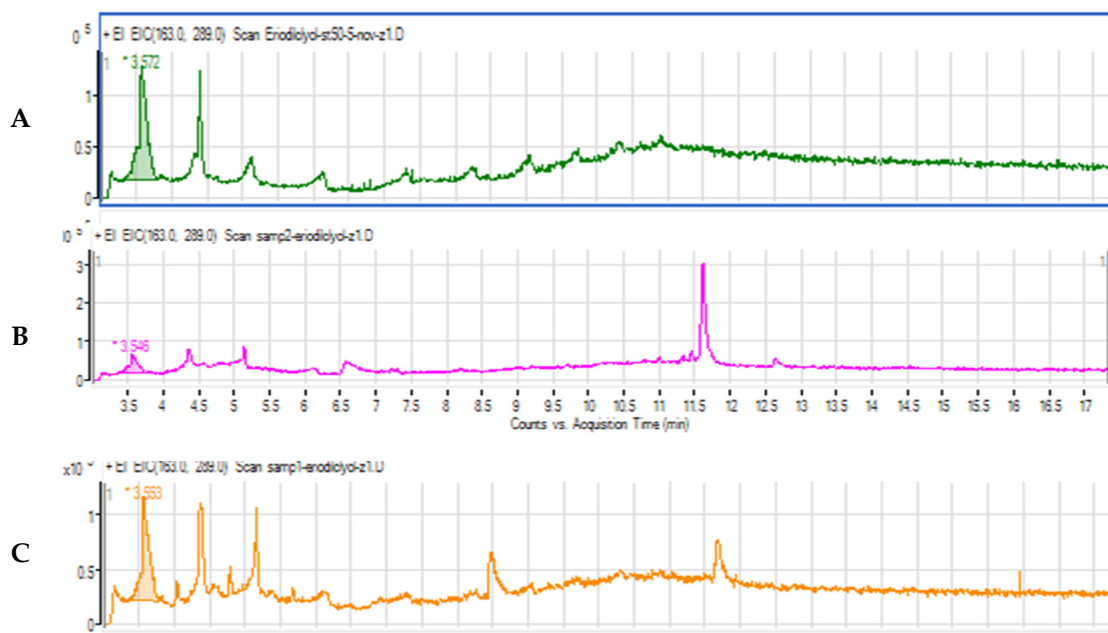

**Figure S3.** GC-MS/MS chromatograms of eriodictyol in a standard solution (A), in the methanolic *T. sanguinea* crude extract (B) and its ethyl acetate fraction (C).

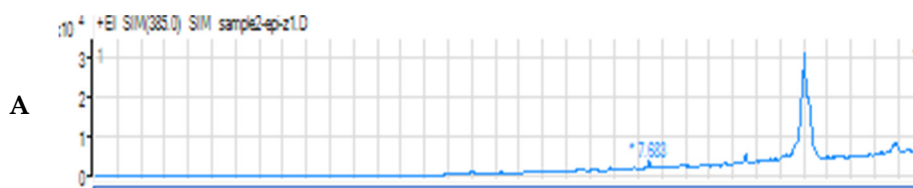

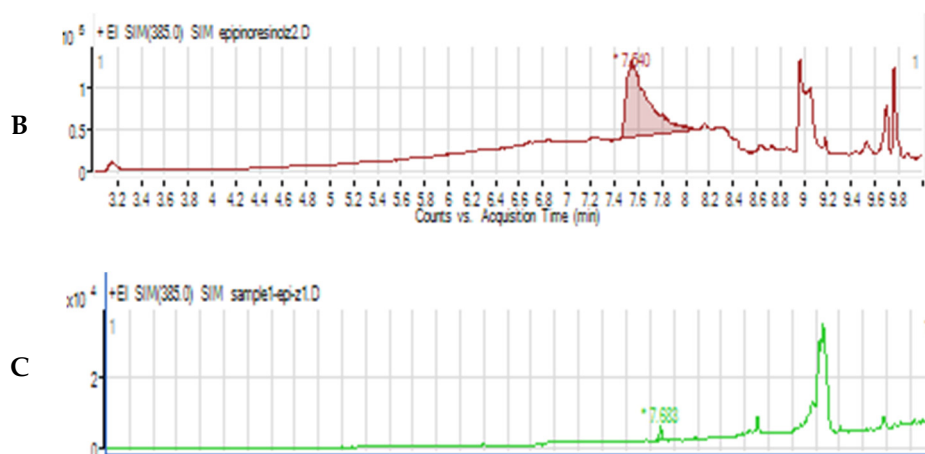

**Figure S4.** GC-MS/MS chromatograms of epipinoresinol in a standard solution (A), in the methanolic *T. sanguinea* crude extract (B) and its ethyl acetate fraction (C).

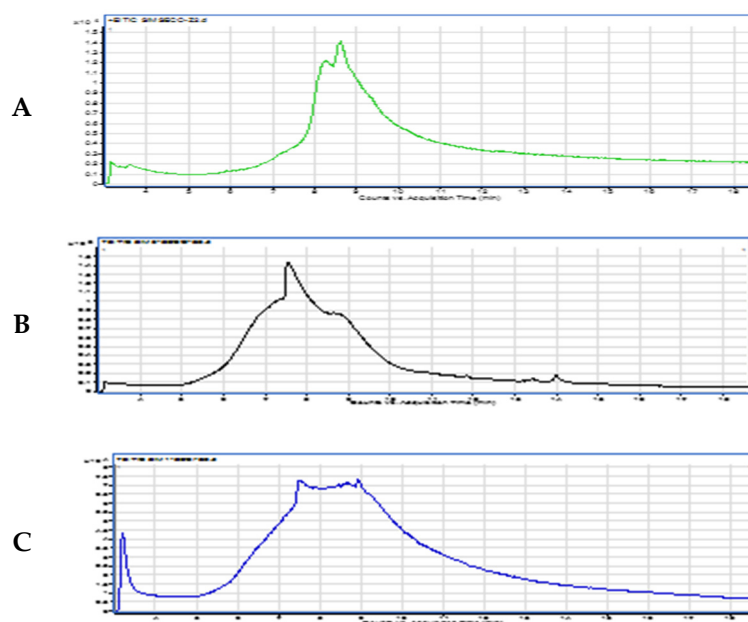

**Figure S5.** GC-MS/MS chromatograms of secoisolariciresinol in a standard solution (A), in the methanolic *T. sanguinea* crude extract (B) and its ethyl acetate fraction (C).
